# Supplementary material
Source: publisher site journal article supplement (https://www.degruyterbrill.com/publication/isbn/9783050048666/downloadAsset/9783050048666_Buchinformation.pdf)
Supplement: Supplementary file 1 [file 9783050048666_Buchinformation.pdf]

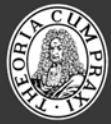

# Akademie Verlag

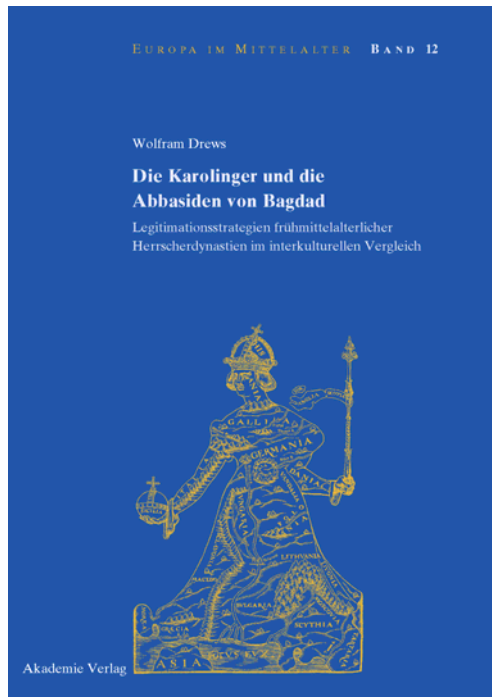

Kordula Wolf

## Troja – Metamorphosen eines Mythos

Französische, englische und italienische  
Überlieferungen des 12. Jahrhunderts  
im Vergleich

*Europa im Mittelalter. Abhandlungen und Beiträge zur  
historischen Komparatistik, Band 13*

2008. 347 S. – 170 x 240 mm,  
Festeinband, € 69,80  
ISBN 978-3-05-004580-1

Troja zählt zu den bekanntesten Mythen Europas. Die Autorin hinterfragt exemplarisch und vergleichend den in der historischen Forschung als selbstverständlich vorausgesetzten Zusammenhang zwischen Mythos und Identitätsstiftung bzw. Herrschaftslegitimation. Sie untersucht die Bedingungen für den Wandel und das Fortleben des Troja-Mythos im Mittelalter auf der Grundlage moderner Mythos-Theorien. Durch diese theoretische Neuverortung kommt neben den Herkunfts- und Gründungserzählungen auch das breite Spektrum anderweitiger Bezüge auf den Troja-Stoff in den Blick. In synchroner wie diachroner Perspektive wird auf textimmanente, literarische und historische Aspekte eingegangen, wobei der Schwerpunkt auf der französischen, englischen und italienischen Historiographie des 12. Jahrhunderts liegt.

*In Vorbereitung:*

Wolfram Drews

### Die Karolinger und die Abbasiden von Bagdad

Legitimationsstrategien frühmittelalterlicher Herrscherdynastien im transkulturellen Vergleich  
*Europa im Mittelalter. Abhandlungen und Beiträge zur historischen Komparatistik, Band 12*

2009. ca. 480 S. – 170 x 240 mm, Festeinband, ca. € 59,80  
ISBN 978-3-05-004560-3
